# Supplementary material
Source: publisher site journal article supplement (http://static.cambridge.org/content/id/urn:cambridge.org:id:article:S0899823X19001119/resource/name/S0899823X19001119supp001.docx)
Supplement: Supplementary file 1 [file S0899823X19001119supp001.docx]

**SUPPLEMENTAL MATERIAL**

**Supplemental Figure 1: Example of a PPE-Free Zone**


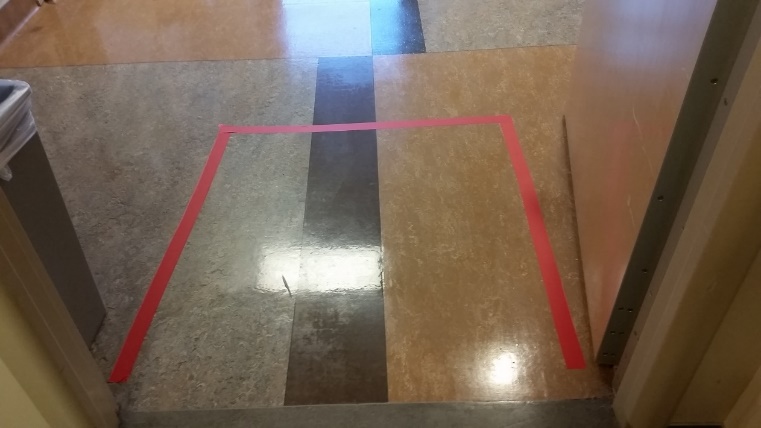


**Supplemental Figure 2a: Hand Hygiene Compliance Plotted Over Study Duration**


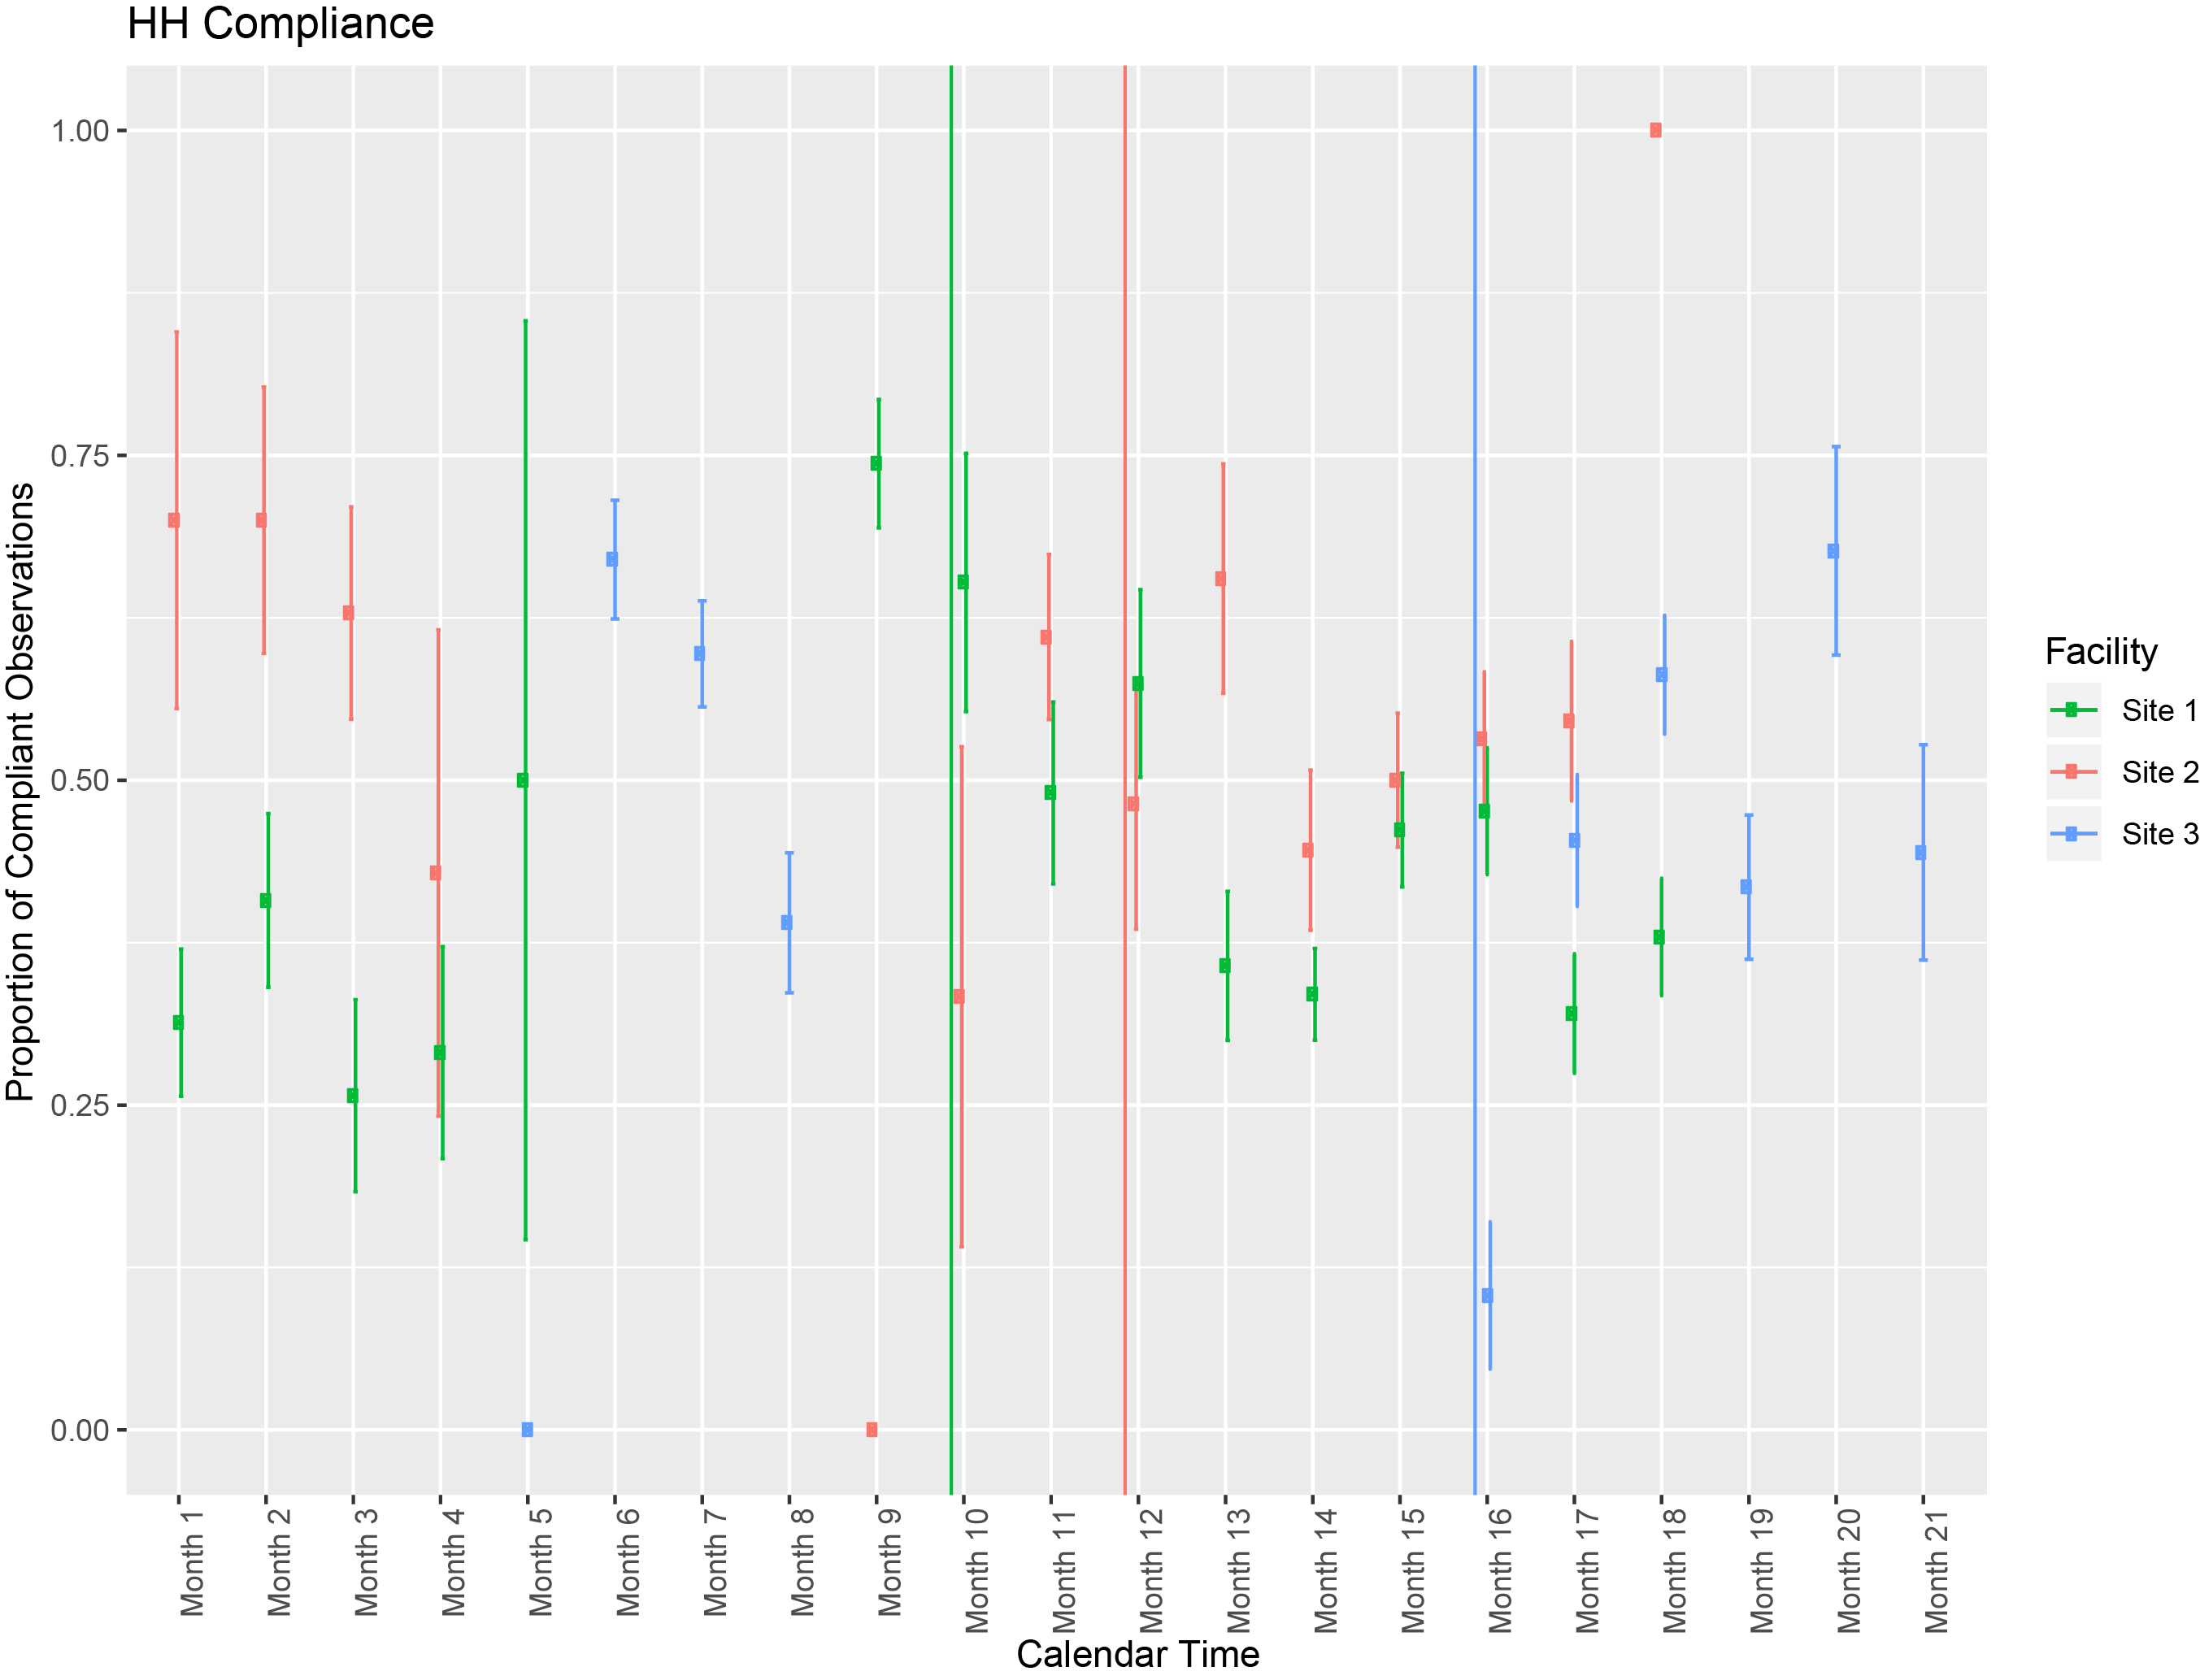


Vertical green line corresponds to intervention start at Site 1; red line to intervention start at Site 2; blue line to intervention start at Site 3.

**Supplemental Figure 2b: PPE Compliance Plotted Over Study Duration**


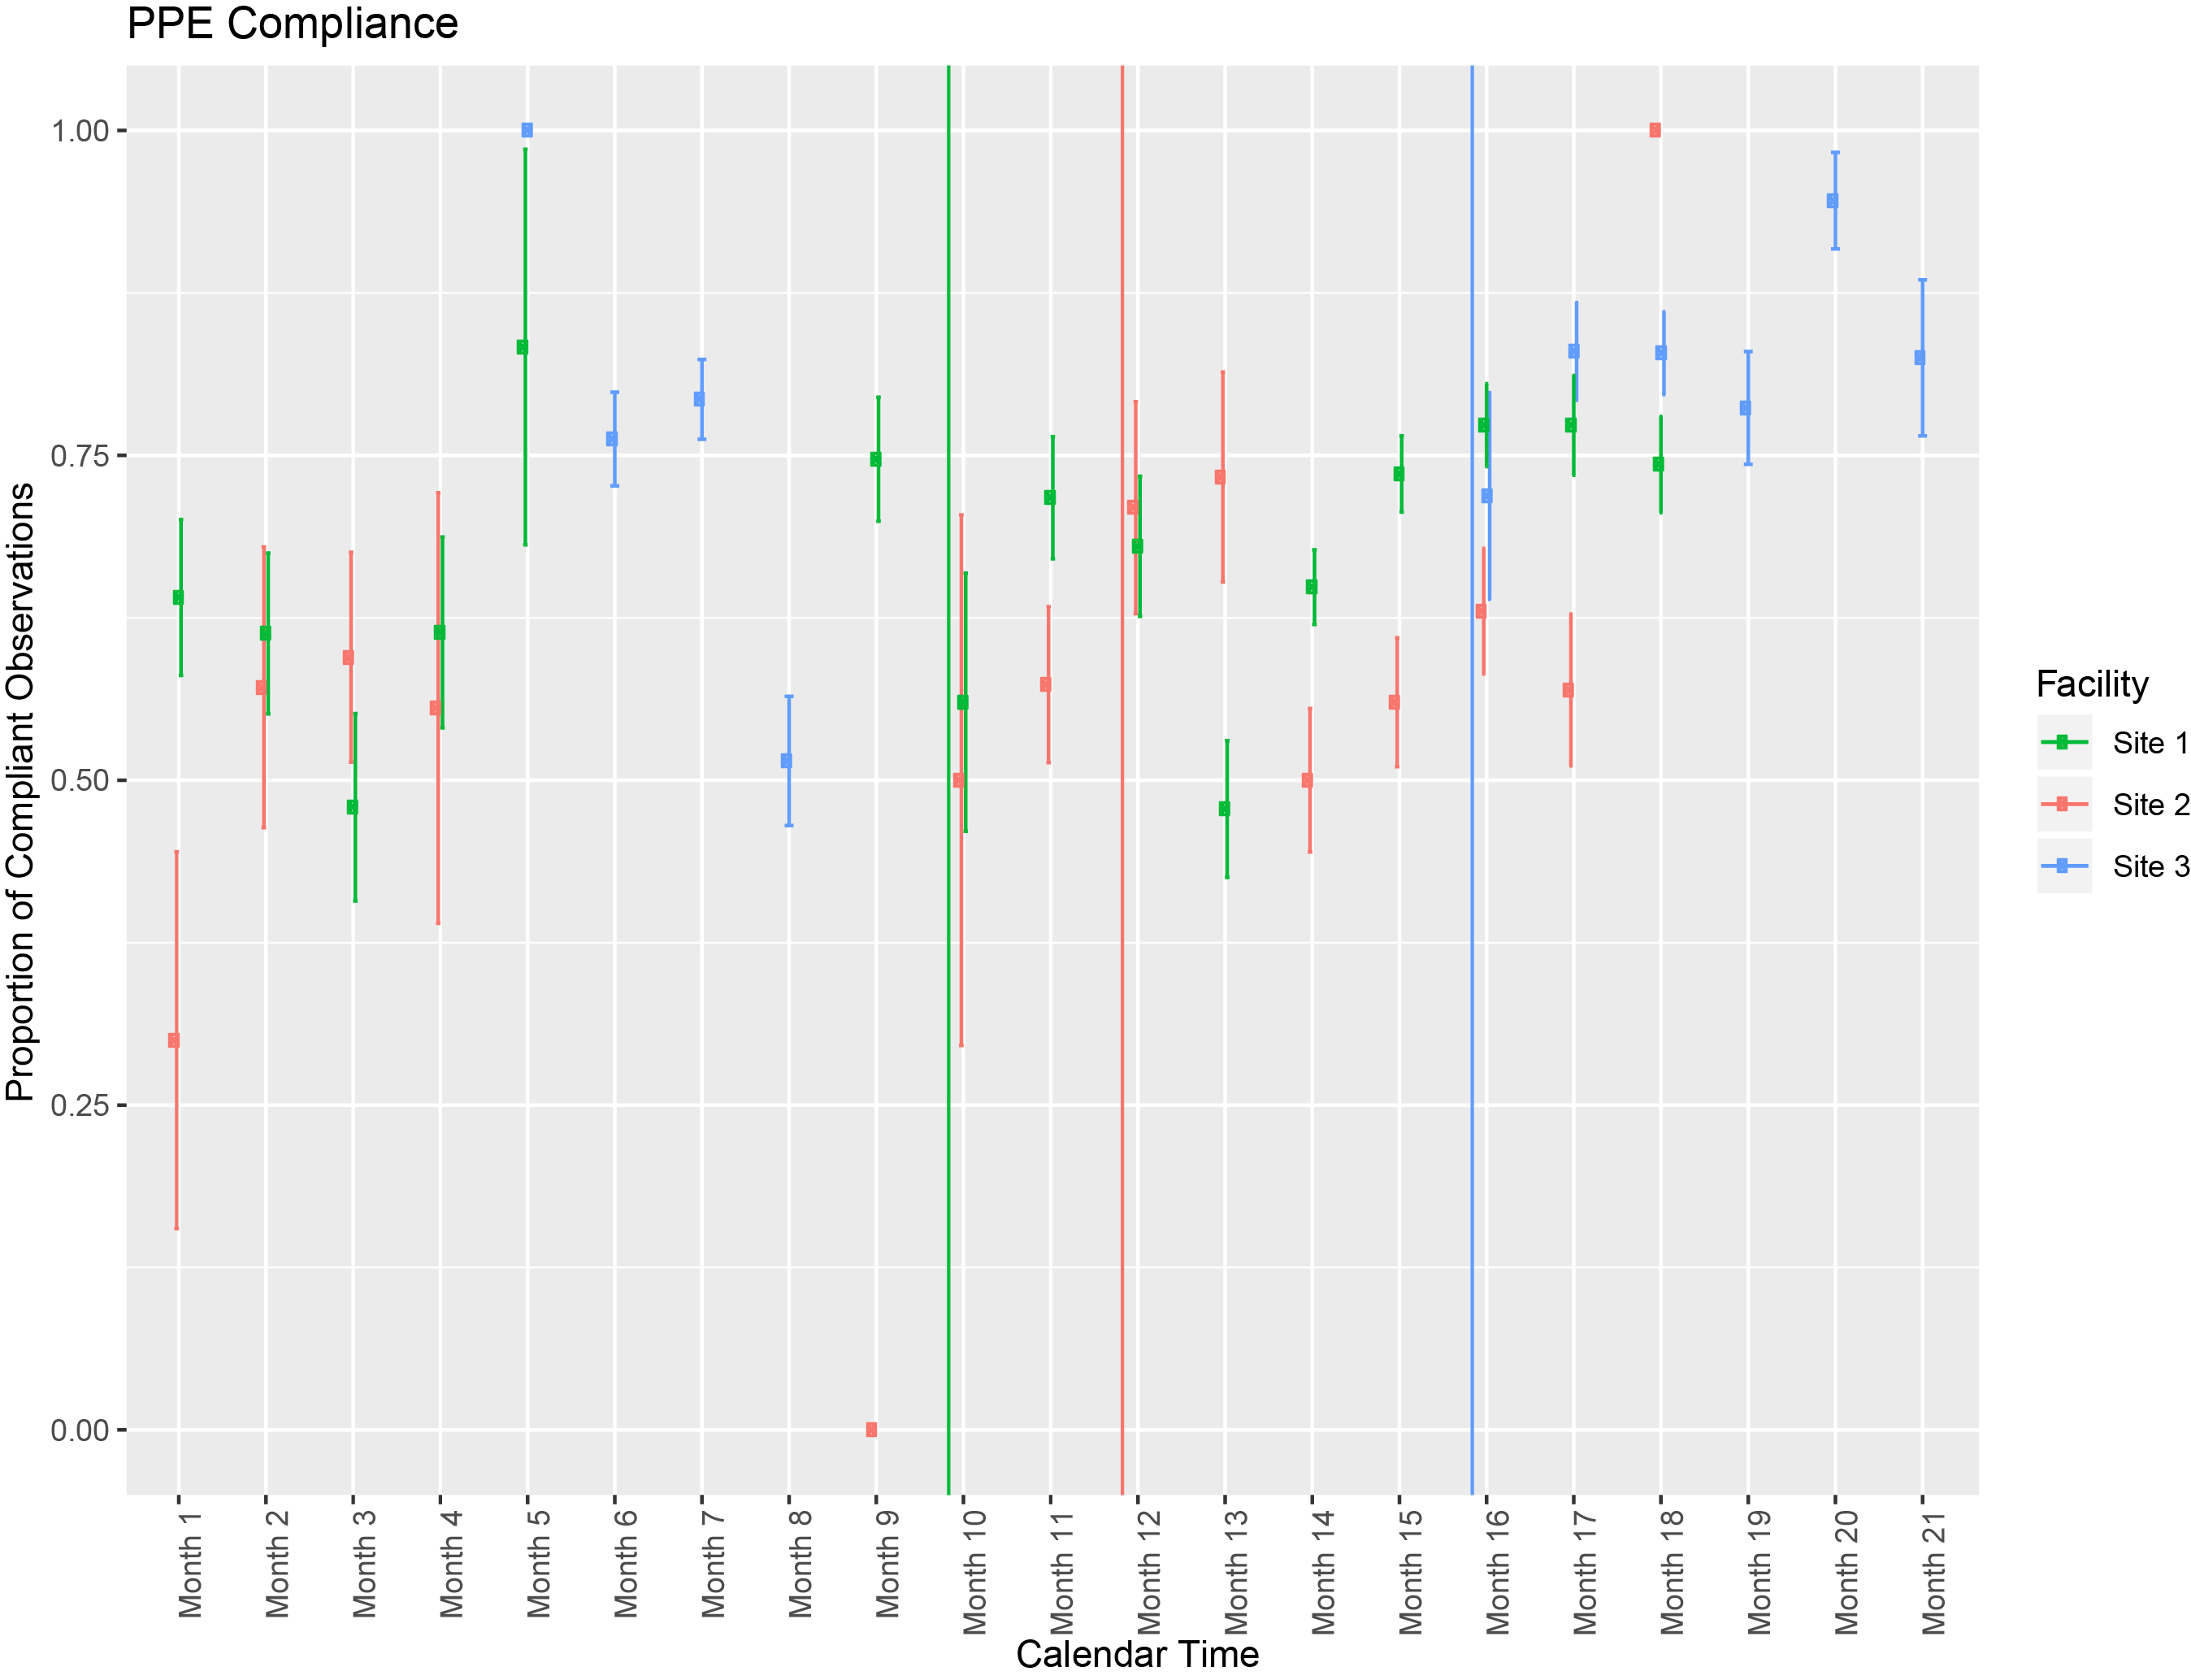


Vertical green line corresponds to intervention start at Site 1; red line to intervention start at Site 2; blue line to intervention start at Site 3.
